# Supplementary material
Source: HighWire-hosted journal article supplement (https://bmjopen.bmj.com/content/7/3/e010711)
Supplement: inline-supplementary-material-1 [file inline-supplementary-material-1.pdf]

Complete list of allele distribution in healthy individuals from the Malay subpopulation

| No. | Code | Allele 1 | Allele 2 |
|-----|------|----------|----------|
| 1   | N1   | 10       | 5        |
| 2   | N2   | 10       | 5        |
| 3   | N3   | 11       | 5        |
| 4   | N5   | 12       | 12       |
| 5   | N6   | 12       | 12       |
| 6   | N7   | 5        | 5        |
| 7   | N10  | 13       | 11       |
| 8   | N25  | 10       | 10       |
| 9   | N26  | 5        | 5        |
| 10  | N31  | 5        | 5        |
| 11  | N32  | 10       | 5        |
| 12  | N33  | 5        | 5        |
| 13  | N35  | 13       | 13       |
| 14  | N36  | 13       | 5        |
| 15  | N37  | 11       | 5        |
| 16  | N38  | 12       | 12       |
| 17  | N40  | 5        | 5        |
| 18  | N45  | 13       | 13       |
| 19  | N46  | 13       | 13       |
| 20  | N47  | 12       | 5        |
| 21  | N51  | 13       | 10       |
| 22  | N52  | 10       | 5        |
| 23  | N59  | 15       | 5        |
| 24  | N60  | 17       | 5        |
| 25  | N63  | 5        | 5        |
| 26  | N68  | 5        | 5        |
| 27  | N73  | 12       | 5        |
| 28  | N78  | 12       | 5        |
| 29  | N80  | 5        | 5        |
| 30  | N82  | 13       | 5        |
| 31  | N84  | 14       | 5        |
| 32  | N87  | 13       | 13       |
| 33  | N89  | 11       | 11       |
| 34  | N90  | 15       | 5        |
| 35  | N92  | 12       | 5        |
| 36  | N95  | 5        | 5        |
| 37  | N97  | 28       | 11       |
| 38  | N99  | 13       | 5        |
| 39  | N101 | 24       | 5        |
| 40  | N105 | 13       | 13       |
| 41  | N108 | 12       | 12       |
| 42  | N110 | 13       | 13       |
| 43  | N116 | 14       | 5        |
| 44  | N118 | 18       | 5        |

|         |    |    |
|---------|----|----|
| 45 N120 | 13 | 13 |
| 46 N125 | 5  | 5  |
| 47 N130 | 12 | 12 |
| 48 N132 | 12 | 12 |
| 49 N133 | 10 | 5  |
| 50 N134 | 12 | 5  |
| 51 N137 | 5  | 5  |
| 52 N139 | 15 | 5  |
| 53 N144 | 10 | 5  |
| 54 N147 | 12 | 5  |
| 55 N148 | 13 | 5  |
| 56 N157 | 13 | 5  |
| 57 N159 | 5  | 5  |
| 58 N160 | 13 | 13 |
| 59 N165 | 12 | 5  |
| 60 N171 | 18 | 10 |
| 61 N173 | 12 | 5  |
| 62 N177 | 13 | 10 |
| 63 N178 | 12 | 5  |
| 64 N179 | 5  | 5  |
| 65 N185 | 13 | 5  |
| 66 N188 | 14 | 5  |
| 67 N189 | 15 | 5  |
| 68 N191 | 17 | 5  |
| 69 N193 | 17 | 5  |
| 70 N195 | 17 | 12 |
| 71 N196 | 16 | 5  |
| 72 N198 | 14 | 5  |
| 73 N199 | 15 | 13 |
| 74 N206 | 17 | 5  |
| 75 N207 | 17 | 5  |
| 76 N208 | 17 | 13 |
| 77 N209 | 16 | 5  |
| 78 N211 | 28 | 12 |
| 79 N212 | 27 | 12 |
| 80 N213 | 17 | 12 |
| 81 N214 | 5  | 10 |
| 82 N215 | 13 | 5  |
| 83 N217 | 15 | 5  |
| 84 N218 | 26 | 10 |
| 85 N219 | 13 | 5  |
| 86 N220 | 13 | 5  |
| 87 N223 | 15 | 12 |
| 88 N228 | 5  | 15 |
| 89 N229 | 24 | 24 |
| 90 N230 | 5  | 5  |
| 91 N232 | 12 | 5  |

|          |    |    |
|----------|----|----|
| 92 N233  | 12 | 5  |
| 93 N234  | 12 | 5  |
| 94 N235  | 12 | 5  |
| 95 N236  | 13 | 5  |
| 96 N239  | 12 | 12 |
| 97 N240  | 26 | 12 |
| 98 N242  | 15 | 12 |
| 99 N242  | 15 | 10 |
| 100 N243 | 5  | 5  |
| 101 N244 | 5  | 5  |
| 102 N245 | 13 | 13 |
| 103 N247 | 13 | 13 |
| 104 M1   | 12 | 5  |
| 105 M2   | 5  | 5  |
| 106 M3   | 5  | 5  |
| 107 M4   | 12 | 12 |
| 108 M5   | 12 | 5  |
| 109 B12  | 12 | 5  |
| 110 B14  | 5  | 5  |
| 111 B18  | 14 | 14 |
| 112 B20  | 5  | 5  |
| 113 B21  | 15 | 15 |
| 114 B34  | 15 | 15 |
| 115 B35  | 13 | 13 |
| 116 B36  | 13 | 5  |
| 117 B37  | 5  | 5  |
| 118 B38  | 5  | 5  |
| 119 B40  | 10 | 10 |
| 120 B48  | 15 | 5  |
| 121 B49  | 12 | 12 |
| 122 B50  | 12 | 12 |
| 123 B53  | 13 | 13 |
| 124 B54  | 12 | 5  |
| 125 B56  | 27 | 10 |
