# Supplementary material
Source: HighWire-hosted journal article supplement (https://bmjopen.bmj.com/content/7/3/e010711)
Supplement: inline-supplementary-material-2 [file inline-supplementary-material-2.pdf]

Complete list of allele distribution in healthy individuals from the Chinese subpopulation

| No. | Code  | Allele 1 | Allele 2 |
|-----|-------|----------|----------|
| 1   | N024W | 11       | 5        |
| 2   | N029W | 11       | 11       |
| 3   | N039W | 13       | 5        |
| 4   | N041W | 13       | 13       |
| 5   | N042W | 11       | 5        |
| 6   | N043W | 12       | 12       |
| 7   | N044W | 12       | 12       |
| 8   | N048W | 12       | 5        |
| 9   | N049W | 12       | 5        |
| 10  | N050W | 11       | 5        |
| 11  | N053W | 13       | 5        |
| 12  | N054W | 12       | 12       |
| 13  | N055W | 12       | 5        |
| 14  | N056W | 13       | 5        |
| 15  | N057W | 14       | 5        |
| 16  | N058W | 12       | 5        |
| 17  | N061W | 13       | 5        |
| 18  | N062W | 12       | 5        |
| 19  | N064W | 12       | 12       |
| 20  | N065W | 13       | 5        |
| 21  | N066W | 24       | 5        |
| 22  | N071W | 11       | 5        |
| 23  | N072W | 12       | 5        |
| 24  | N074W | 13       | 13       |
| 25  | N075W | 12       | 5        |
| 26  | N076W | 14       | 14       |
| 27  | N077W | 13       | 5        |
| 28  | N079W | 12       | 5        |
| 29  | N081W | 12       | 12       |
| 30  | N083W | 12       | 12       |
| 31  | N085W | 14       | 5        |
| 32  | N086W | 27       | 5        |
| 33  | N088W | 5        | 5        |
| 34  | N093W | 11       | 11       |
| 35  | N094W | 11       | 5        |
| 36  | N096W | 12       | 12       |
| 37  | N098W | 15       | 5        |
| 38  | N100W | 13       | 5        |
| 39  | N103W | 12       | 12       |
| 40  | N104W | 12       | 5        |
| 41  | N106W | 12       | 5        |
| 42  | N107W | 12       | 12       |
| 43  | N111W | 14       | 5        |
| 44  | N112W | 15       | 15       |

|          |    |    |
|----------|----|----|
| 45 N113W | 5  | 5  |
| 46 N114W | 13 | 5  |
| 47 N115W | 12 | 12 |
| 48 N117W | 13 | 13 |
| 49 N119W | 13 | 5  |
| 50 N122W | 5  | 5  |
| 51 N124W | 12 | 12 |
| 52 N127W | 12 | 12 |
| 53 N128W | 13 | 5  |
| 54 N138W | 5  | 5  |
| 55 N142W | 11 | 11 |
| 56 N143W | 5  | 5  |
| 57 N146W | 13 | 13 |
| 58 N149W | 12 | 12 |
| 59 N150W | 13 | 5  |
| 60 N151W | 13 | 5  |
| 61 N152W | 11 | 11 |
| 62 N153W | 11 | 11 |
| 63 N154W | 27 | 16 |
| 64 N155W | 13 | 5  |
| 65 N156W | 11 | 5  |
| 66 N158W | 13 | 5  |
| 67 N161W | 15 | 15 |
| 68 N162W | 12 | 5  |
| 69 N163W | 12 | 5  |
| 70 N164W | 15 | 15 |
| 71 N166W | 12 | 5  |
| 72 N167W | 12 | 12 |
| 73 N168W | 5  | 5  |
| 74 N169W | 15 | 5  |
| 75 N170W | 11 | 11 |
| 76 N172W | 11 | 5  |
| 77 N174W | 12 | 5  |
| 78 N175W | 13 | 5  |
| 79 N176W | 15 | 15 |
| 80 N180W | 11 | 5  |
| 81 N181W | 12 | 5  |
| 82 N182W | 11 | 11 |
| 83 N183W | 13 | 13 |
| 84 N184W | 5  | 5  |
| 85 N186W | 23 | 14 |
| 86 N187W | 12 | 12 |
| 87 N190W | 12 | 12 |
| 88 N194W | 12 | 12 |
| 89 N197W | 11 | 11 |
| 90 N200W | 12 | 5  |
| 91 N221W | 12 | 12 |

|          |    |    |
|----------|----|----|
| 92 N222W | 11 | 11 |
| 93 N224W | 13 | 13 |
| 94 N227W | 15 | 5  |
| 95 N237W | 13 | 5  |
| 96 C1    | 11 | 5  |
| 97 C2    | 5  | 12 |
| 98 C3    | 11 | 11 |
| 99 C4    | 13 | 13 |
| 100 C5   | 12 | 12 |
| 101 C6   | 11 | 5  |
| 102 C7   | 12 | 12 |
| 103 C8   | 12 | 5  |
| 104 C9   | 11 | 5  |
| 105 C10  | 12 | 5  |
| 106 C11  | 12 | 5  |
| 107 C12  | 13 | 13 |
| 108 C13  | 15 | 15 |
| 109 C15  | 13 | 13 |
| 110 C16  | 11 | 5  |
| 111 C19  | 12 | 5  |
| 112 C20  | 12 | 12 |
| 113 C22  | 12 | 5  |
| 114 C24  | 12 | 5  |
| 115 C25  | 12 | 12 |
| 116 C27  | 13 | 13 |
| 117 C29  | 11 | 11 |
| 118 C30  | 12 | 5  |
| 119 C31  | 12 | 5  |
| 120 C32  | 14 | 14 |
| 121 C33  | 12 | 12 |
| 122 C34  | 12 | 12 |
| 123 C35  | 12 | 12 |
| 124 C36  | 5  | 5  |
| 125 C37  | 12 | 5  |
| 126 C38  | 11 | 5  |
| 127 C39  | 16 | 5  |
