# Supplementary material
Source: HighWire-hosted journal article supplement (https://bmjopen.bmj.com/content/7/3/e010711)
Supplement: inline-supplementary-material-3 [file inline-supplementary-material-3.pdf]

Complete list of allele distribution in healthy individuals from the Indian subpopulation

| No. | Code | Allele 1 | Allele 2 |
|-----|------|----------|----------|
| 1   | I001 | 14       | 14       |
| 2   | I005 | 5        | 5        |
| 3   | I007 | 15       | 5        |
| 4   | I008 | 11       | 11       |
| 5   | I009 | 12       | 5        |
| 6   | I010 | 5        | 5        |
| 7   | I011 | 23       | 11       |
| 8   | I012 | 12       | 12       |
| 9   | I014 | 11       | 5        |
| 10  | I015 | 5        | 5        |
| 11  | I016 | 13       | 13       |
| 12  | I017 | 14       | 5        |
| 13  | I018 | 11       | 11       |
| 14  | I019 | 12       | 12       |
| 15  | I020 | 24       | 12       |
| 16  | I021 | 12       | 12       |
| 17  | I022 | 12       | 12       |
| 18  | I023 | 12       | 12       |
| 19  | I025 | 12       | 5        |
| 20  | I026 | 12       | 12       |
| 21  | I029 | 20       | 12       |
| 22  | I030 | 10       | 12       |
| 23  | I031 | 12       | 12       |
| 24  | I032 | 12       | 12       |
| 25  | I033 | 14       | 14       |
| 26  | I034 | 11       | 11       |
| 27  | I035 | 15       | 11       |
| 28  | I036 | 13       | 5        |
| 29  | I037 | 19       | 11       |
| 30  | I038 | 11       | 5        |
| 31  | I039 | 12       | 12       |
| 32  | I040 | 17       | 5        |
| 33  | I041 | 11       | 5        |
| 34  | I042 | 14       | 12       |
| 35  | I043 | 12       | 5        |
| 36  | I044 | 13       | 5        |
| 37  | I045 | 5        | 5        |
| 38  | I046 | 12       | 12       |
| 39  | I047 | 12       | 5        |
| 40  | I048 | 11       | 11       |
| 41  | I049 | 12       | 12       |
| 42  | I050 | 12       | 12       |
| 43  | I051 | 12       | 12       |
| 44  | I052 | 5        | 5        |

|          |    |    |
|----------|----|----|
| 45 I053  | 14 | 5  |
| 46 I055W | 11 | 5  |
| 47 I056W | 12 | 5  |
| 48 I057W | 12 | 5  |
| 49 I059W | 12 | 5  |
| 50 I060W | 11 | 5  |
| 51 I061W | 5  | 5  |
| 52 I062W | 12 | 12 |
| 53 I064W | 12 | 12 |
| 54 I066W | 16 | 5  |
| 55 I067W | 12 | 5  |
| 56 I068W | 10 | 10 |
| 57 I069W | 11 | 11 |
| 58 I070W | 18 | 5  |
| 59 I071W | 11 | 5  |
| 60 I073W | 11 | 11 |
| 61 I074W | 20 | 11 |
| 62 I075W | 11 | 11 |
| 63 I077W | 13 | 13 |
| 64 I078W | 12 | 12 |
| 65 I079W | 5  | 5  |
| 66 I085W | 12 | 12 |
| 67 I086W | 12 | 5  |
| 68 I087W | 11 | 5  |
| 69 I088W | 5  | 5  |
| 70 I089W | 5  | 5  |
| 71 I090W | 12 | 12 |
| 72 I091W | 11 | 11 |
| 73 I093W | 12 | 12 |
| 74 I094W | 23 | 11 |
| 75 I095W | 18 | 5  |
| 76 I096W | 12 | 12 |
| 77 I097W | 12 | 5  |
| 78 I098W | 29 | 12 |
| 79 I099W | 12 | 12 |
| 80 I102W | 12 | 12 |
| 81 I103W | 11 | 5  |
| 82 I104W | 25 | 5  |
| 83 I105W | 11 | 5  |
| 84 I106W | 11 | 11 |
| 85 I107W | 11 | 5  |
| 86 I108W | 12 | 5  |
| 87 I109W | 13 | 13 |
| 88 I110W | 12 | 12 |
| 89 I111W | 12 | 5  |
| 90 I112W | 12 | 5  |
| 91 I113  | 12 | 5  |

|          |    |    |
|----------|----|----|
| 92 I114  | 5  | 5  |
| 93 I116  | 11 | 5  |
| 94 I117  | 14 | 11 |
| 95 I118  | 11 | 5  |
| 96 I119  | 5  | 5  |
| 97 I120  | 11 | 5  |
| 98 I121  | 13 | 13 |
| 99 I123  | 12 | 12 |
| 100 I124 | 19 | 12 |
| 101 I125 | 12 | 12 |
| 102 I126 | 18 | 11 |
| 103 I127 | 13 | 5  |
| 104 I129 | 12 | 12 |
| 105 I130 | 12 | 5  |
| 106 I131 | 19 | 11 |
| 107 I133 | 12 | 12 |
| 108 I137 | 13 | 13 |
| 109 I138 | 5  | 5  |
| 110 I140 | 12 | 12 |
| 111 I144 | 12 | 5  |
| 112 I145 | 12 | 5  |
| 113 I146 | 5  | 5  |
| 114 I150 | 12 | 12 |
| 115 I151 | 14 | 14 |
| 116 I153 | 12 | 5  |
| 117 I156 | 12 | 12 |
| 118 I158 | 12 | 5  |
| 119 I159 | 13 | 13 |
| 120 I160 | 12 | 5  |
| 121 I162 | 12 | 5  |
| 122 I163 | 16 | 5  |
| 123 I164 | 11 | 5  |
| 124 I167 | 13 | 5  |
| 125 I168 | 12 | 12 |
